# 1 **Estimates and determinants of health facility delivery** 2 **in the Birhan cohort in Ethiopia**

3 Bezawit M. Hunegnaw<sup>1\*</sup>, Frederick G. B. Goddard<sup>2</sup>, Delayehu Bekele<sup>3</sup>, Sebastien Haneuse<sup>4</sup>, Clara Pons-  
4 Duran<sup>2</sup>, Mesfin Zeleke<sup>5</sup>, Yahya Mohammed<sup>5</sup>, Chalachew Bekele<sup>5</sup>, Grace J. Chan<sup>1,2,6</sup>

5  
6 <sup>1</sup>Department of Pediatrics and Child Health, St. Paul's Hospital Millennium Medical College, Addis Ababa,  
7 Ethiopia

8  
9 <sup>2</sup>Department of Epidemiology, Harvard T.H. Chan School of Public Health, Boston, MA, USA

10  
11 <sup>3</sup>Department of Obstetrics and Gynecology, St. Paul's Hospital Millennium Medical College, Addis Ababa,  
12 Ethiopia

13  
14 <sup>4</sup>Department of Biostatistics, Harvard T.H. Chan School of Public Health, Boston, MA, USA

15  
16 <sup>5</sup>Birhan HDSS, St. Paul's Hospital Millennium Medical College, Addis Ababa, Ethiopia

17  
18 <sup>6</sup>Division of Medicine Critical Care, Boston Children's Hospital, Harvard Medical School Boston, MA, USA\_

19  
20

21 \*Corresponding author

22 E-mail: [Bezawit.hune@gmail.com](mailto:Bezawit.hune@gmail.com) (BH)

23  
24

## 25 **Abstract**

26 Health facility delivery is one of the critical indicators to monitor progress towards the provision of  
27 skilled delivery care and reduction in perinatal mortality. In Ethiopia, utilization of health facilities for  
28 skilled delivery care has been increasing but varies greatly by region and among specific socio-  
29 demography groups. We aim to measure the prevalence and determinants of health facility delivery in  
30 the Amhara region in Ethiopia.

31 From December 2018 to November 2020, we conducted a longitudinal study from a cohort of 2801  
32 pregnant women and described the location of delivery and the association with determinants. We

33 interviewed a subset of women who delivered in the community and analyzed responses using the three  
34 delays model to understand reasons for not using health facility services. A multivariable poisson  
35 regression model with robust error variance was used to estimate the presence and magnitude of  
36 association between location of delivery and the determinants.

37 Of the 2,482 pregnant women followed through to birth, 73.6% (n=1,826) gave birth in health facilities,  
38 24.3% (n=604) gave birth at home and 2.1% (n=52) delivered on the way to a health facility.  
39 Determinants associated with increased likelihood of delivery at a health facility included formal  
40 maternal education, shorter travel times to health facilities, primiparity, higher wealth index and having  
41 attended at least one ANC visit. Most common reasons mothers gave for not delivering in a health  
42 facility were delays in individual/family decision to seek care. The proportion of deliveries occurring in  
43 health facilities is improving but falls below targets. Interventions that focus on the identified social-  
44 demographic determinants to improve uptake of health facility delivery care are warranted.

## 45 Introduction

46 Globally, an estimated 810 maternal deaths and 12,000 perinatal deaths occur every day, mostly from  
47 preventable causes related to pregnancy and childbirth (1–3). Most of these deaths occur  
48 disproportionately in low- and middle-income countries. Sub-Saharan Africa in particular continues to  
49 suffer the highest rates, accounting for nearly two-thirds of all maternal deaths and two-fifths of global  
50 newborn deaths (4,5). Ethiopia is one of the countries in this category where maternal and perinatal  
51 mortality rates continue to be high.

52 Effective interventions and care packages known to prevent maternal and perinatal mortality include  
53 emergency obstetric and newborn care, active management of third stage of labor, blood transfusion,  
54 management of sepsis, all of which are provided in the setup of health facilities. Delivery in a health  
55 facility with the provision of skilled care during and immediately after delivery is a key strategy that can  
56 improve perinatal outcomes by providing clinical assessment to detect and manage complications,  
57 provide timely and lifesaving interventions, as well as referrals, when needed (6–8). It is estimated that  
58 54% of maternal deaths and 43% of neonatal deaths can be prevented each year with the provision of  
59 skilled care during delivery (9,10). However, many women give birth outside of health facilities with no  
60 access to such care and interventions, and are therefore at risk for serious complications, such as  
61 hemorrhage or sepsis (11).

62 The Sustainable Development Goal 3 (SDG 3) has set a target for all countries to lower the Maternal  
63 Mortality Ratio (MMR) to less than 70 per 100,000 of live births by 2030. The proportion of births  
64 attended by skilled birth attendants (SBAs) is one of the critical progress indicators used to monitor the  
65 achievement of this goal to reduce maternal and newborn morbidity and mortality (11–13). Under SDG  
66 3.1, the aim is to increase the proportion of births assisted by SBAs to 90% (14). In order to achieve this  
67 in Ethiopia, the national Health Sector Transformation Plan II (HSTP II) aims to increase the rate of

68 institutional delivery to 76% by 2024-25, hence increasing the proportion of deliveries with access to  
69 skilled delivery care and interventions.

70 According to the Ethiopian Demographic Health Survey (EDHS), the proportion of deliveries occurring in  
71 health facilities have increased from 10% in 2011 to 26% in 2016 and 48% in 2019 (15,16). However, the  
72 figures vary widely across and within the country's regions, with 95% of births delivered in health  
73 facilities in the capital city Addis Ababa in contrast to 28% in the Afar region (16). The most recent  
74 estimates from 2019 report that four of the eleven regions in Ethiopia have health facility delivery rates  
75 below 50%, five of the regions (including the Amhara region) reported skilled birth attendance between  
76 50% and 70%, and the remaining two regions had 70% or more deliveries in health facilities (16). This  
77 underlines the wide gaps in utilization of facility-based delivery services in different parts of Ethiopia  
78 that are far from national and global targets.

79 Several factors at individual, household and community levels have been identified as key determinants  
80 that influence the location of delivery. In different contexts in sub-Saharan Africa, factors such as place  
81 of residence, household wealth, education and distance to health facilities have been shown to  
82 determine where women give birth (17–22). In the Ethiopian context, there have been observations of  
83 significant heterogeneity based on individual and community level factors showing varying degrees of  
84 association of these determinants to location of delivery (23–28). Trends of health facility delivery have  
85 been dynamic, with most regions showing improvement in utilization of facility-based skilled delivery  
86 care services (15,16). However, some regions have shown a decline (29). Therefore, it is important to  
87 identify the magnitude and direction of change in the utilization of these key services, as well as  
88 understand the effect of determinants on different populations and subgroups to identify inequalities  
89 and ensure equitable distribution of service delivery. The evidence generated from this study will be  
90 useful to understand progress, model successes and take best practices to scale as well as recommend  
91 key interventions to increase the prevalence of skilled delivery attendance. We aim to provide estimates

92 of health facility deliveries and describe the factors that affect location of delivery in the Amhara region  
93 of Ethiopia from 2018 to 2020.

## 94 **Methods**

### 95 **Study design and study setting**

96 We conducted a pregnancy and birth cohort study, the Birhan maternal and child health (MCH) cohort  
97 nested within the Birhan field site (30). The field site is in the North Shewa zone of Ethiopia, located 130  
98 km north of the capital city, Addis Ababa (31). The catchment area consists of two districts, Angolela  
99 Tera and Kewet/Shewa Robit, covering a population of 79,653 individuals and 19,957 households. Each  
100 district is composed of eight clusters (*kebeles*). The area is predominantly rural.

### 101 **Study population**

102 Pregnancies within the HDSS were identified through pregnancy screening during quarterly house to  
103 house surveillance visits within the study catchment area or during visits to health facility (30). The  
104 Birhan MCH cohort study enrolls consenting pregnant women within the catchment area and follows  
105 them for birth and birth outcomes. Pregnancy outcomes were ascertained through scheduled follow up  
106 of the cohort at home and in the health facilities. Our analysis included data collected from all pregnant  
107 women followed through to birth from December 2018 to November 2020 (30). We excluded data if  
108 pregnancies were not followed through to birth, for example due to miscarriage, death, outmigration, or  
109 lost to follow-up.

### 110 **Definition of outcomes and determinants**

111 The primary outcome for this study was location of delivery, and whether this was in a health facility or  
112 in the community. Facility/institutional delivery was defined as delivery occurring in a hospital, primary  
113 level health center or a clinic. Community delivery was defined as delivery occurring outside of a health  
114 institution, either at home or on the way to a health institution.

115 To assess wealth, we used principal component analysis of household assets to categorize households  
116 into five distinct quintiles according to the guidelines of the DHS program (DHS program). The living  
117 conditions and assets included in the PCA to create the index were selected based on the list of variables  
118 used in the Ethiopian DHS 2019. Parity was defined as the number of times a woman has given birth and  
119 responses were coded as primiparous for women who gave birth for the first time and multiparous for  
120 those who had more than one birth. Maternal formal education was categorized into three levels to  
121 include those with no formal education, those with only primary level education and those with  
122 secondary level of education or higher. To estimate the effect of distance from mothers' residence to  
123 closest health facility, we used maternal estimates of travel times to the health facility.

## 124 **Data collection**

125 The Birhan field site includes quarterly house-to-house surveillance and data collection on household  
126 sociodemographic and baseline individual information as well as pregnancy screening and identification.  
127 Follow up data for members of the MCH cohort were collected through scheduled home visits and  
128 facility visits when women presented for antenatal care or delivery. Scheduled home visits were  
129 conducted every three months until 32 weeks of gestation, every two weeks until 36 weeks of gestation  
130 and subsequently, every week until delivery. To assist in identification of community births, several birth  
131 notification mechanisms were employed, including key community informants and self-notification by  
132 families. A structured Open Data Kit based electronic data collection system was used to enter  
133 responses and observational data that were then sent to a central, secured server. Participant data were  
134 deidentified and authors had no access to information that could identify participants during or after  
135 data collection.

136 To collect data on the main outcome (location of delivery), home-based interviews and facility-based  
137 study observations were performed. Responses were categorized as births that occurred in a health

138 facility, at home, or on the way to a health facility. For the purposes of further analyses, women who  
139 delivered at home and on the way to a health facility were grouped together as community deliveries,  
140 given that only few women delivered on the way to a health facility to be considered as a separate  
141 group for analysis. Additionally, it may be assumed that women who delivered on the way to a facility  
142 may have attempted to deliver at home, but later decided to deliver in a health facility.

143 To describe association of determinants to location of delivery, covariates were selected based on  
144 literature review which included sociodemographic characteristics such as place of residence (rural vs  
145 urban), wealth index, level of education, maternal age, distance to health facility, ethnicity, and religion  
146 as well as obstetric characteristics such as parity, number of ANC visits and day of delivery. These were  
147 further categorized into four themes: socio-cultural factors, perceived benefit/need of skilled  
148 attendance, economic accessibility, and physical accessibility (32). To understand the reasons for home  
149 delivery, women who were reached within the first week of birth were asked about their main reason  
150 for home delivery.

## 151 **Statistical analysis**

152 Descriptive analyses were performed to estimate the prevalence of institutional deliveries as well as the  
153 differences in characteristics between women who delivered in the different locations. To describe  
154 presence and magnitude of associations between determinants and outcome, a multivariable poisson  
155 regression analysis with robust error variance was performed, presented as follows:

$$\log(y) = \alpha + \beta_1x_1 + \beta_2x_2 + \dots + \beta_nx_n$$

156 Where,

157 Y is the dependent variable,

158  $\beta$  is the regression coefficient,

159 x is the predictor variable

160 Considering the main outcome to be more common (more than 10%), we measured associations  
161 between the factors and outcome using relative risk instead of odds ratios in order to avoid  
162 overestimation of the relationship. Bivariate associations between each covariate and location of  
163 delivery were explored independently. Variables that were statistically significant at  $p < 0.05$  were  
164 entered together into the multivariable model. In the multivariable model, those considered not  
165 statistically significant at  $p < 0.05$  were removed from the model and re-entered one at a time, keeping  
166 only those that became statistically significant. Presence of collinearity was assessed by computing the  
167 variance inflation factor and adjusting for any highly correlated variables. To describe any variability of  
168 the outcome based on community clusters, a random effect regression model was employed. Extraction  
169 of dependent and independent variables from the longitudinal dataset and preliminary analyses were  
170 done using R Version 4.0.2 and Stata Version 15.1.

171 Among women who delivered in the community, we described the mothers' reasons for not delivering  
172 in a health facility. Data from coded responses and free text were summarized in thematic areas and  
173 presented.

174 To consider the possible effect of loss to follow up on our findings, we performed sensitivity analyses to  
175 re-estimate prevalence assuming all pregnancies lost to follow-up resulted in community births or  
176 facility births.

## 177 **Ethics statement**

178 This study was approved by the Institutional Review Boards (IRBs) of St Paul's Hospital Millennium  
179 Medical College (SPHMMC), Addis Ababa, Ethiopia, under approval number [PM 23/274] and Boston  
180 Children's Hospital, Boston, MA, United States, under approval number [IRB-P00028224]. Formal  
181 informed consent was obtained from eligible pregnant women prior to enrollment into the cohort.



## 182 Results

183 A total of 2,801 pregnant women were identified and enrolled to the study. Pregnancy outcomes follow  
184 up was completed for 2,628 (93.8%) participants. The overall cohort characteristics and birth outcome  
185 information are published elsewhere (33). Among those with complete pregnancy outcome follow up,  
186 2,482 women, whose pregnancies were in the gestational age range of 28 to 46 weeks at birth, were  
187 included in this analysis (Table 1)

188 **Table 1: Sociodemographic and Obstetric characteristics of women enrolled in the Birhan MCH cohort,**  
189 **2018-2020 (n=2482)**

190

| Variable                                   | Frequency (n, %) |
|--------------------------------------------|------------------|
| <b>Place of residence</b>                  |                  |
| Rural                                      | 2012 (81.1%)     |
| Urban                                      | 470 (18.9%)      |
| Missing                                    | 0                |
| <b>Maternal age at conception</b>          |                  |
| 25-34 years                                | 1200 (48.4%)     |
| 35 -49 years                               | 333 (13.4%)      |
| Missing                                    | 4 (0.2%)         |
| <b>Formal education (Maternal)</b>         |                  |
| None                                       | 1139 (47.6%)     |
| Primary                                    | 1005 (42.0%)     |
| Secondary or above                         | 248 (10.4%)      |
| Missing                                    | 90 (3.6%)        |
| <b>Wealth Index</b>                        |                  |
| Poorest                                    | 523 (21.1%)      |
| Poorer                                     | 558 (22.5%)      |
| Middle                                     | 490 (19.7%)      |
| Richer                                     | 452 (18.2%)      |
| Richest                                    | 459 (18.5%)      |
| Missing                                    | 0                |
| <b>Religion</b>                            |                  |
| Christian (Orthodox, Protestant, Catholic) | 2040 (82.4%)     |
| Muslim                                     | 437 (17.6%)      |
| Missing                                    | 5 (0.2%)         |
| <b>Ethnicity</b>                           |                  |
| Amhara                                     | 2257 (91.1%)     |

|                                                   |              |
|---------------------------------------------------|--------------|
| Oromo                                             | 149 (6.0%)   |
| Other                                             | 71 (2.9%)    |
| Missing                                           | 5 (0.2%)     |
| <b>Distance to health facility (walking time)</b> |              |
| <0.5 hour                                         | 575 (23.3%)  |
| 0.5 to 1 hour                                     | 1063 (43.1%) |
| > 1 hour                                          | 830 (33.6%)  |
| Missing                                           | 14 (0.6%)    |
| <b>Parity</b>                                     |              |
| Multiparous                                       | 1714 (69.1%) |
| Primiparous                                       | 768 (30.9%)  |
| Missing                                           | 0            |
| <b>Day of birth</b>                               |              |
| Weekend                                           | 651 (26.2%)  |
| Weekday                                           | 1831 (73.8%) |
| Missing                                           | 0            |
| <b>Number of ANC visits</b>                       |              |
| 0                                                 | 202 (8.1%)   |
| 1                                                 | 464 (18.7%)  |
| 2                                                 | 595 (24.0%)  |
| 3                                                 | 596 (24.0%)  |
| 4+                                                | 625 (25.2%)  |
| Missing                                           | 0            |
| <b>Delivery attendant</b>                         |              |
| Non-skilled                                       | 637 (25.7%)  |
| Skilled                                           | 1844 (74.3%) |
| Other/Unknown                                     | 1 (0)        |
| Missing                                           | 0            |

---

191  
 192

193 The mean age of the participants at enrollment was 27 years ( $\pm$  6 years). Most women (48.4%) were  
 194 between 25 to 34 years of age, while 38.1% were between ages 15 and 24. Of the women in the cohort,  
 195 81.1% lived in rural areas and 43.6% came from poor households in the lowest two quintiles. No formal  
 196 education was reported by 47.6% of the participants, while 42% had some primary level education. The  
 197 Amhara ethnic group made up 91.1% of the study participants with 6% from the Oromo ethnic group.  
 198 Religious groups were identified as Christians (82.4%) and Muslims (17.6%). Multiparous women

199 accounted for 69% of the study population. During their pregnancy, 91.9% of women had at least one  
200 ANC visit, 25.2% had 4 or more ANC visits, while 8.1% had no recorded or reported ANC visits. (Table 1)

201  
202 **Proportion of births in health facilities**  
203 During the study period, out of a total of 2,482 women, 1,826 women (73.6%) gave birth in health  
204 facilities, 604 births (24.3%) occurred at home and 52 women (2.1%) delivered on the way to a health  
205 facility. All of the births in health facilities and 42.3% (n=22) of the births that occurred on the way to a  
206 health facility received care from an SBA. None of the deliveries that occurred at home were attended  
207 by an SBA. (Table 2)

208  
209 **Table 2: Location of delivery and skilled delivery care during birth for women enrolled in the Birhan**  
210 **MCH cohort, 2018-2020**  
211

| Variable                      | N    | n (%)        |
|-------------------------------|------|--------------|
| <b>Place of delivery</b>      |      |              |
| Health facility               | 2482 | 1826 (73.6%) |
| Home                          | 2482 | 604 (24.3%)  |
| On the way to health facility | 2482 | 52 (2.1%)    |
| <b>Delivered by SBA</b>       |      |              |
| Health facility               | 1826 | 1822 (99.8%) |
| Home                          | 604  | 0 (0)        |
| On the way to health facility | 52   | 22 (42.3%)   |

212  
213  
214 **Bivariate analysis**  
215 Women living in urban areas (RR = 1.29; 95% CI 1.23-1.34), having primary level education (RR = 1.22;  
216 95% CI 1.16-1.29), secondary education or above (RR = 1.48; 95% CI 1.40-1.56), and primiparous (RR =  
217 1.31; 95% CI 1.25-1.37) had a higher likelihood of delivering in a health facility . Having longer travel  
218 times to the nearest health facility of half an hour to an hour (RR = 0.82; 95% CI 0.79-0.86), and over an  
219 hour (RR = 0.62; 95% CI 0.58-0.66) reduced the likelihood of institutional delivery. Women between 35–  
220 49 years old were less likely to deliver in a health facility compared to their younger counterparts (RR =

221 0.82; 95% CI 0.76-0.90). Differences in location of delivery were also observed among different religions;  
 222 Muslim women were less likely to deliver in a health facility (RR = 0.88; 95% CI 0.82-0.94) compared to  
 223 women from Christian religion. Women who had at least one ANC visit were more likely to deliver in a  
 224 health facility, with women who had 4 or more ANC visits having the highest likelihood of facility  
 225 delivery (RR = 1.78; 95% CI 1.54-2.06). Household wealth was also associated with place of delivery, with  
 226 women from wealthier households having increased likelihood to deliver in a health facility. No  
 227 statistically significant differences were observed from the bivariate analysis on location of delivery  
 228 based on days of the week (weekday vs weekend) when the women delivered (Table 3).

229  
 230 **Table 3: Unadjusted relative risk ratio for determinants of facility delivery for women enrolled in the**  
 231 **Birhan MCH cohort, 2018-2020**  
 232

| Exposure variable                    | N    | Facility delivery<br>(n, %) | Community<br>delivery<br>(n, %) | Unadj. RR (95% CI) |
|--------------------------------------|------|-----------------------------|---------------------------------|--------------------|
| <b><i>Socio-cultural factors</i></b> |      |                             |                                 |                    |
| <b>Maternal age at conception</b>    |      |                             |                                 |                    |
| 15-24 years                          | 945  | 755 (80)                    | 190 (20)                        | Reference          |
| 25-34 years                          | 1200 | 849 (71)                    | 351 (29)                        | 0.89 (0.84 - 0.93) |
| 35 -49 years                         | 333  | 219 (66)                    | 114 (34)                        | 0.82 (0.76 - 0.90) |
| <b>Formal education</b>              |      |                             |                                 |                    |
| None                                 | 1139 | 730 (64)                    | 409 (36)                        | Reference          |
| Primary                              | 1005 | 787 (78)                    | 218 (22)                        | 1.22 (1.16 - 1.29) |
| Secondary or above                   | 248  | 235 (95)                    | 13 (5)                          | 1.48 (1.40 - 1.56) |
| <b>Religion</b>                      |      |                             |                                 |                    |
| Christian                            | 2040 | 507 (25)                    | 1533 (75)                       | Reference          |
| Muslim                               | 437  | 149 (34)                    | 288 (66)                        | 0.88 (0.82 - 0.94) |
| <b><i>Economic accessibility</i></b> |      |                             |                                 |                    |
| <b>Wealth Index</b>                  |      |                             |                                 |                    |
| Poorest                              | 523  | 325 (62)                    | 198 (38)                        | Reference          |
| Poorer                               | 558  | 312 (56)                    | 246 (44)                        | 0.90 (0.81 - 0.99) |
| Middle                               | 490  | 355 (72)                    | 135 (28)                        | 1.17 (1.07 - 1.27) |
| Richer                               | 452  | 398 (88)                    | 54 (12)                         | 1.42 (1.31 - 1.53) |
| Richest                              | 459  | 436 (95)                    | 23 (5)                          | 1.53 (1.43 - 1.64) |
| <b><i>Physical accessibility</i></b> |      |                             |                                 |                    |
| <b>Place of residence</b>            |      |                             |                                 |                    |
| Rural                                | 2012 | 608 (30)                    | 1404 (70)                       | Reference          |

|                                                            |      |          |           |                    |
|------------------------------------------------------------|------|----------|-----------|--------------------|
| Urban                                                      | 470  | 48 (10)  | 422 (90)  | 1.29 (1.23 - 1.34) |
| <b>Distance to health facility (walking time)</b>          |      |          |           |                    |
| < 0.5 hour                                                 | 575  | 43 (7)   | 532 (93)  | Reference          |
| 0.5 to 1 hour                                              | 1063 | 254 (24) | 809 (76)  | 0.82 (0.79 - 0.86) |
| > 1 hour                                                   | 830  | 355 (43) | 475 (57)  | 0.62 (0.58 - 0.66) |
| <b><i>Perceived benefit/need of skilled attendance</i></b> |      |          |           |                    |
| <b>Number of ANC visits</b>                                |      |          |           |                    |
| 0                                                          | 202  | 103 (51) | 99 (49)   | Reference          |
| 1                                                          | 464  | 165 (36) | 299 (64)  | 1.31 (1.12 - 1.54) |
| 2                                                          | 595  | 175 (29) | 420 (71)  | 1.44 (1.24 - 1.67) |
| 3                                                          | 596  | 134 (22) | 462 (78)  | 1.58 (1.37 - 1.83) |
| 4 and above                                                | 625  | 79 (13)  | 546 (87)  | 1.78 (1.54 - 2.06) |
| <b>Parity</b>                                              |      |          |           |                    |
| Multiparous                                                | 1714 | 563 (33) | 1151 (67) | Reference          |
| Primiparous                                                | 768  | 93 (12)  | 675 (88)  | 1.31 (1.25 - 1.37) |
| <b>Day of birth</b>                                        |      |          |           |                    |
| Weekend                                                    | 651  | 161 (25) | 490 (75)  | Reference          |
| Weekday                                                    | 1831 | 495 (27) | 1336 (73) | 0.97 (0.92 - 1.02) |

233

234

## 235 **Multivariate analysis**

236 In multivariate analysis, maternal formal education, religion, wealth index, distance to health facility,

237 number of ANC visits and parity remained statistically significant. The influence of maternal formal

238 education was attenuated in the multivariate model and showed marginally increased likelihood of

239 women with primary level of education to deliver in health facilities (aRR = 1.08; 95% CI 1.02-

240 1.13). Women from the richest households were 22% more likely to give birth in a health facility (aRR =

241 1.22; 95% CI 1.12 - 1.32). Similarly, ANC attendance continued to show strong positive association with

242 location of delivery and women who attended 4 or more ANC visits had 48% increased likelihood of

243 delivering at a health facility (aRR = 1.48; 95% CI 1.29 - 1.70). Primiparous women were also more likely

244 to have institutional delivery than multiparous counterparts (aRR = 1.18; 95% CI 1.13 - 1.23). Conversely,

245 women from muslim households were 20% less likely to deliver in health facilities (aRR = 0.8, 95% CI

246 0.74 - 0.87). Women who had more than an hour walking time to a health facility were 21% less likely to

247 deliver in a health facility (aRR = 0.79; 95% CI 0.73 - 0.85) The effect of place of residence (rural/urban)  
 248 and maternal age were not statistically significant after controlling for other variables included in the  
 249 model (Table 4).

250 In the null model, 13.3% of the total variance in the odds of delivering in a health facility was accounted  
 251 by between cluster (*kebele*) variability (ICC 0.133; SE 0.04). In the final adjusted model, the variability  
 252 remained significant, but declined to 6.4% (ICC 0.064; SE 0.03).

253  
 254 **Table 4: Adjusted relative risk ratio for determinants of facility delivery for women enrolled in the**  
 255 **Birhan MCH cohort, 2018-2020**  
 256

| Exposure variable                                          | Adjusted RR (95% CI) |
|------------------------------------------------------------|----------------------|
| <b><i>Socio-cultural factors</i></b>                       |                      |
| <b>Formal education</b>                                    |                      |
| None                                                       | Reference            |
| Primary                                                    | 1.08 (1.02 - 1.13)   |
| Secondary or above                                         | 1.06 (1.0 - 1.12)    |
| <b>Religion</b>                                            |                      |
| Christian                                                  | Reference            |
| Muslim                                                     | 0.80 (0.74 - 0.87)   |
| <b><i>Economic accessibility</i></b>                       |                      |
| <b>Wealth Index</b>                                        |                      |
| Poorest                                                    | Reference            |
| Poorer                                                     | 0.90 (0.82 - 0.99)   |
| Middle                                                     | 1.05 (0.96 - 1.14)   |
| Richer                                                     | 1.22 (1.12 - 1.32)   |
| Richest                                                    | 1.22 (1.12 - 1.32)   |
| <b><i>Physical accessibility</i></b>                       |                      |
| <b>Distance to health facility (walking time)</b>          |                      |
| < 0.5 hour                                                 | Reference            |
| 0.5 to 1 hour                                              | 0.93 (0.89 - 0.97)   |
| > 1 hour                                                   | 0.79 (0.73 - 0.85)   |
| <b><i>Perceived benefit/need of skilled attendance</i></b> |                      |
| <b>Number of ANC visits</b>                                |                      |
| 0                                                          | Reference            |
| 1                                                          | 1.24 (1.07 - 1.43)   |
| 2                                                          | 1.30 (1.13 - 1.50)   |
| 3                                                          | 1.40 (1.21 - 1.61)   |
| 4 and above                                                | 1.48 (1.29 - 1.70)   |

## Parity

Multiparous

Reference

Primiparous

1.18 (1.13 - 1.23)

---

257

258

## 259 **Reasons for birth in the community**

260 The specific reasons of a subset of 470 women who delivered at home were classified into three phases  
261 under the three delays model: delay in deciding to seek care (Phase I delay), delay in reaching the  
262 health facility (Phase II delay) and delay in receiving care at the health facility (Phase III delay) (Fig 1).  
263 Approximately 80% of the reasons were related to phase I delay, with the other participants referring to  
264 phase II delays. Among those with phase I delay, the most common reasons cited included perception of  
265 fast progress of labor (68.1%), maternal preference to deliver at home (23.1%) and lack of anyone to  
266 accompany the mother (7.7%). Reasons resulting in phase II delay included the health facility being too  
267 far away (85.1%) and difficulties accessing transportation, which included delayed or unreachable  
268 ambulance services (14.9%) (Fig 1 and 2).

269 Fig 1: Maternal reasons for Phase I and Phase II delay in the community among women enrolled in the  
270 Birhan MCH cohort 2018-2020

271

## 272 **Sensitivity analyses**

273 A total of 173 pregnant women (6.2%) were lost to follow up. Assuming all these women delivered in  
274 the community and had no skilled delivery attendance, the point estimate for prevalence of facility birth  
275 would decrease from 73.5% to 68.7%, and skilled delivery attendance would decrease from 74.3% to  
276 69.4%. With the assumption that all these women delivered in health facilities, the prevalence would  
277 increase from 73.5% to 75.2% for facility birth and 74.3% to 75.9% for skilled delivery attendance.  
278 Therefore, the possible range of prevalence for facility births was 68.7 to 75.2%, and for skilled delivery  
279 attendance was 69.4 to 75.9%.

## 280 **Discussion**

281 This study provided estimates of health facility delivery which is a key component to track progress  
282 towards achieving SDG 3.1 to reduce maternal mortality. We identified that 73.6% of study participants  
283 gave birth in a health facility. Furthermore, several individual, social and economic determinants,  
284 including number of ANC visits, level of education and wealth index, influenced where women gave birth  
285 and are discussed below in greater detail.

286 We found a higher prevalence of facility births compared to national surveys in Ethiopia. The EDHS 2019  
287 reported 54.2% prevalence of facility births in the Amhara region and 47.5% facility births nationwide  
288 (16). Surveys like the EDHS are based on recall of events over the five years preceding the survey and  
289 may have limited ability to present timely estimates of coverage. Estimates from other studies  
290 conducted at the same time vary, with those from the Amhara region reporting facility birth prevalence  
291 in the range of 45% to 62% (24,34–38). Over the past decade, there has been a 200% increase in facility  
292 delivery coverage from 10.5% in 2011 to 52.5% in 2019 (15,16,39), largely attributed to the work of the  
293 Health Development Army (HDA), prohibition of the use of traditional birth attendants (TBAs), increase  
294 in the number of staffed health centers, and improved transport infrastructure (40–42). Our estimates  
295 of facility-based delivery and skilled birth attendance align with the increasing trend in coverage  
296 observed through the past years.

297  
298 Our study explored factors under the broad classification of socio-cultural (age, ethnicity, religion,  
299 education), economic accessibility (wealth index), physical accessibility (place of residence, distance to  
300 health facility) and perceived benefit/need of skilled attendance (number of ANC visits, parity, day of  
301 birth) based on the conceptual framework proposed by Sabine Gabrysch et al (32). We identified that  
302 women who lack any formal education, come from poorest or poorer wealth quintile, reside over an  
303 hour walking distance from health facility and had no ANC follow up during pregnancy are less likely to



304 deliver in a health facility. These findings are comparable to those from other studies in low-income  
305 countries where they were shown to be important factors affecting where women deliver (17,43–46).

306  
307 Maternal formal education influences health seeking behavior and health related decisions in different  
308 pathways. Formal education curricula provide health, hygiene, nutrition and care-seeking messages and  
309 enrich women’s health knowledge base (47). Women with more education tend to seek additional  
310 sources of information from media and understand educational messages better, are more receptive to  
311 health updates, more influential in decision making processes, and in turn, are able to make better  
312 health decisions (45,48–53). Similarly, wealth is an important determinant of facility delivery as women  
313 and families with higher resources are likely to have better awareness, ability to pay for and access  
314 information and services (49,52–54). This finding may be an important marker of inequality that  
315 highlights the recent gains in health facility delivery have left behind certain subgroups of the population  
316 who require targeted messages, interventions and continued investment on economic welfare.

317  
318 Women with higher parity are more inclined to deliver at home, which could be due to prior favorable  
319 child-birth experiences and lower felt need for assistance (55). Educational and other interventional  
320 programs can be specifically designed to target these subgroups to improve awareness regarding the  
321 significance of skilled delivery care. Similar to other studies in low income countries, we show that  
322 having one or more ANC visits was associated with better uptake of facility-based services, likely due to  
323 the benefit of familiarizing women with the health system, antenatal counselling and birth  
324 preparedness packages (20,56). Prior studies have shown that attending the number of ANC visits  
325 recommended by WHO provides frequent contacts with health facility and opportunities to improve  
326 trust with providers, and deliver more counselling and key interventions (57).

327

328 Evidence from previous studies that included distance as a determinant have shown less use of health  
329 facility delivery care with increasing distance from health facilities (58–60) and link to adverse health  
330 outcomes (61–63). Distance to health facilities presents a dual obstacle to women by discouraging them  
331 from seeking initial care and by presenting challenges to reaching facilities after they have made the  
332 decision to seek care (64). Dotse-Gborgbortsi et al have shown that a kilometer increase in distance  
333 reduced likelihood of health facility delivery by 6.7% (59). In this study, we have quantified distance in  
334 terms of travel time that encompasses not only linear distance, but also includes challenges related to  
335 modes of transportation to better reflect the effect on the decision-making process. Measurement and  
336 analysis of travel times is a useful way to better identify underserved areas and those at increased need  
337 of access to services to ensure equitable distribution of services.

338

339

340 The most cited reason for not delivering in a health facility was linked to Phase I in the delay model with  
341 participants reporting a delay in deciding to seek care. The majority of the women in our cohort had the  
342 perception that their labor progressed too fast and felt they did not have enough time to make  
343 decisions. This could be due to poor knowledge and awareness of the signs and progress of labor. Many  
344 women also expressed their personal preference to have deliveries at home, which may relate to a lack  
345 of awareness of the benefits of skilled delivery attendance, prior self or family experiences with  
346 pregnancy and delivery, as well as perception of low risk for the index pregnancy (32). With the  
347 recognition that every pregnancy is at risk, there is a need to educate women on the importance of a  
348 birth plan during ANC that outlines how to access the closest health facility that has the capacity to  
349 perform deliveries and handle complications.

350

351 Phase II in the delay model, delay in reaching the health facility, was also a common reason mentioned  
352 by women in our study for not delivering in a health facility. Over the past years, the Ethiopian  
353 government has made investments in improving physical accessibility to care in health facilities with the  
354 establishment of Maternity Waiting Homes (MWH). While this initiative offers an inexpensive method of  
355 improving access to health services, studies have shown that there is poor uptake of these services due  
356 to lack of awareness, lack of transportation to the MWHs, shortage of food and basic supplies in these  
357 MWHs, and lack of child care for younger children at home (65). This calls for intensified community  
358 awareness activities about the importance and utilization of MWHs as well as their incorporation into  
359 individual birth preparedness and readiness plans, especially for those women with significant  
360 challenges related to access. Further assessment of the condition of MWHs and services needs to be  
361 made to improve the situation and cater to the needs of mothers and families. Additionally, locally  
362 sourced solutions need to be sought for women and families with most severe challenges.

363

## 364 **Strengths and Limitations**

365 A strength of this study is its contribution of longitudinal data that includes community and facility-  
366 based ascertainment of where and when pregnancy outcomes occur, in a large and representative  
367 sample population. Additionally, we measure and describe associations in terms of relative risk which is  
368 a more accurate estimation of the relationship between the covariates and a common outcome. Our  
369 analysis of influence of determinants on the study outcome highlight key areas and subgroups of the  
370 population to target for further interventions. This may serve as a useful model that can be used in  
371 different settings to understand the true burden of the identified challenges.

372

373 As a limitation, it is worth noting the effect of study related community surveillance activities on  
374 encouraging uptake of facility-based services during pregnancy and delivery. To the extent possible, the  
375 study implemented an observational design and the proportion of deliveries in health facilities have  
376 remained fairly constant throughout the study. The presence of any Hawthorne effect is anticipated to  
377 be insignificant. Approximately 6% of pregnancies were lost to follow up, but this was not expected to  
378 alter findings as sensitivity analyses demonstrated limited variation in the outcome estimate based on  
379 assumed scenarios of prevalence from missing data. Additional assessment of decision-making roles in  
380 the household may have been helpful to understand the role of participant women and specific family  
381 members in key decisions that prevent delays in seeking and receiving skilled care.

## 382 **Conclusion**

383 The coverage of health facility delivery is increasing in Ethiopia, but falls below the national and global  
384 targets. There are significant inequalities in access and utilization of skilled care during childbirth. This  
385 study has identified and measured the multidimensional determinants to highlight gaps and areas of  
386 focus. Increased investment in formal education, ANC attendance and access to care, among others, are  
387 needed to ensure equitable access and utilization. The design of interventions should focus on those

388 with otherwise unfavorable determinants such as women from the poor wealth quintiles, those with  
389 high parity and those with long travel times to health facilities. Efforts to maximize the use of existing  
390 interventions should include education of mothers on the signs and progress of labor during ANC visits,  
391 as well as making facility-based delivery services accessible and usable by mothers with unfavorable  
392 predictors.

## 393 **Declaration of interests**

394 The authors declare no competing interests.

## 395 **Acknowledgements**

396 We would like to thank all mothers and families who participated in the study and the community of the  
397 Birhan field site. We thank the data collectors, supervisors and the HaSET team for their contributions.

## 398 **Supporting information**

399 S1 File: Multivariate poisson regression for determinants of health facility delivery

## 400 **References**

- 401 1. WHO, UNFPA. Ending Preventable Maternal Mortality (EPMM) [Internet]. 2021. Available from:  
402 [https://cdn.who.int/media/docs/default-source/mca-documents/maternal-nb/ending-preventable-](https://cdn.who.int/media/docs/default-source/mca-documents/maternal-nb/ending-preventable-maternal-mortality_epmm_brief-230921.pdf?sfvrsn=f5dcf35e_5)  
403 [maternal-mortality\\_epmm\\_brief-230921.pdf?sfvrsn=f5dcf35e\\_5](https://cdn.who.int/media/docs/default-source/mca-documents/maternal-nb/ending-preventable-maternal-mortality_epmm_brief-230921.pdf?sfvrsn=f5dcf35e_5)
- 404 2. UN Inter-agency Group for Child Mortality Estimation. Child mortality and stillbirth estimates  
405 [Internet]. 2021. Available from: <https://childmortality.org/>
- 406 3. Lawn JE, Blencowe H, Waiswa P, Amouzou A, Mathers C, Hogan D, et al. Stillbirths: rates, risk  
407 factors, and acceleration towards 2030. *The Lancet*. 2016 Feb;387(10018):587–603.
- 408 4. World Health Organization, World Bank, United Nations Population Fund, United Nations  
409 Children’s Fund (UNICEF). Trends in maternal mortality: 1990-2015: estimates from WHO, UNICEF,  
410 UNFPA, World Bank Group and the United Nations Population Division [Internet]. Geneva: World Health  
411 Organization; 2015 [cited 2023 Jan 31]. Available from: <https://apps.who.int/iris/handle/10665/194254>
- 412 5. Sharrow D, Hug L, You D, Alkema L, Black R, Cousens S, et al. Global, regional, and national  
413 trends in under-5 mortality between 1990 and 2019 with scenario-based projections until 2030: a

- 414 systematic analysis by the UN Inter-agency Group for Child Mortality Estimation. *Lancet Glob Health*.  
415 2022 Feb;10(2):e195–206.
- 416 6. Kinney MV, Kerber KJ, Black RE, Cohen B, Nkrumah F, Coovadia H, et al. Sub-Saharan Africa’s  
417 Mothers, Newborns, and Children: Where and Why Do They Die? *PLoS Med*. 2010 Jun 21;7(6):e1000294.
- 418 7. World Health Organization. Targets and Strategies for Ending Preventable Maternal Mortality  
419 [Internet]. 2014. Available from:  
420 [http://apps.who.int/iris/bitstream/handle/10665/130776/WHO\\_RHR\\_14.21\\_eng.pdf?sequence=1](http://apps.who.int/iris/bitstream/handle/10665/130776/WHO_RHR_14.21_eng.pdf?sequence=1)
- 421 8. World Health Organization. World health statistics 2019: monitoring health for the SDGs,  
422 sustainable development goals [Internet]. Geneva: World Health Organization; 2019 [cited 2023 Jan 17].  
423 120 p. Available from: <https://apps.who.int/iris/handle/10665/324835>
- 424 9. Pattinson R, Kerber K, Buchmann E, Friberg IK, Belizan M, Lansky S, et al. Stillbirths: how can  
425 health systems deliver for mothers and babies? *The Lancet*. 2011 May;377(9777):1610–23.
- 426 10. Save the Children. Ending Newborn Deaths - Ensuring every baby survives [Internet]. Save the  
427 Children; 2014. Available from: [https://www.healthynewbornnetwork.org/hnn-](https://www.healthynewbornnetwork.org/hnn-content/uploads/ENGLISH-Ending-Newborn-Deaths-Exec-Summ-English-SCI-low-res.pdf)  
428 [content/uploads/ENGLISH-Ending-Newborn-Deaths-Exec-Summ-English-SCI-low-res.pdf](https://www.healthynewbornnetwork.org/hnn-content/uploads/ENGLISH-Ending-Newborn-Deaths-Exec-Summ-English-SCI-low-res.pdf)
- 429 11. UNICEF. SDG overview, Goal 3: Good health and well-being [Internet]. Available from:  
430 <https://data.unicef.org/sdgs/goal-3-good-health-wellbeing/>
- 431 12. Moran AC, Jolivet RR, Chou D, Dalglish SL, Hill K, Ramsey K, et al. A common monitoring  
432 framework for ending preventable maternal mortality, 2015–2030: phase I of a multi-step process. *BMC*  
433 *Pregnancy Childbirth*. 2016 Dec;16(1):250.
- 434 13. World Health Organization. World Health Statistics [Internet]. World Health Organization; 2023.  
435 Available from: [https://www.who.int/data/gho/data/themes/topics/topic-details/GHO/world-health-](https://www.who.int/data/gho/data/themes/topics/topic-details/GHO/world-health-statistics)  
436 [statistics](https://www.who.int/data/gho/data/themes/topics/topic-details/GHO/world-health-statistics)
- 437 14. World Health Organization. Health in 2015: from MDGs, Millennium Development Goals to  
438 SDGs, Sustainable Development Goals [Internet]. Geneva: World Health Organization; 2015 [cited 2023  
439 Jan 17]. 204 p. Available from: <https://apps.who.int/iris/handle/10665/200009>
- 440 15. Ethiopia Demographic and Health Survey 2016. [Internet]. Central Statistical Agency - CSA  
441 Ethiopia and ICF; 2016. Available from: <http://dhsprogram.com/pubs/pdf/FR328/FR328.pdf>
- 442 16. Ethiopian Public Health Institute (EPHI) and ICF. Ethiopia Mini Demographic and Health Survey  
443 2019: Final Report [Internet]. 2021. Available from:  
444 <https://dhsprogram.com/pubs/pdf/FR363/FR363.pdf>
- 445 17. Babalola S, Fatusi A. Determinants of use of maternal health services in Nigeria - looking beyond  
446 individual and household factors. *BMC Pregnancy Childbirth*. 2009 Dec;9(1):43.
- 447 18. Palamuleni M. Determinants of non-institutional deliveries in Malawi. *Malawi Med J J Med*  
448 *Assoc Malawi*. 2011;23,4:104–8.

- 449 19. Bain LE, Aboagye RG, Dowou RK, Kongnyuy EJ, Memiah P, Amu H. Prevalence and determinants  
450 of maternal healthcare utilisation among young women in sub-Saharan Africa: cross-sectional analyses  
451 of demographic and health survey data. *BMC Public Health*. 2022 Apr 5;22(1):647.
- 452 20. Manyeh AK, Akpakli DE, Kukula V, Ekey RA, Narh-Bana S, Adjei A, et al. Socio-demographic  
453 determinants of skilled birth attendant at delivery in rural southern Ghana. *BMC Res Notes*. 2017  
454 Dec;10(1):268.
- 455 21. Damian DJ, Tibelerwa JY, John B, Philemon R, Mahande MJ, Msuya SE. Factors influencing  
456 utilization of skilled birth attendant during childbirth in the Southern highlands, Tanzania: a multilevel  
457 analysis. *BMC Pregnancy Childbirth*. 2020 Dec;20(1):420.
- 458 22. Ameyaw EK, Dickson KS. Skilled birth attendance in Sierra Leone, Niger, and Mali: analysis of  
459 demographic and health surveys. *BMC Public Health*. 2020 Dec;20(1):164.
- 460 23. Shiferaw BB, Modiba LM. Why do women not use skilled birth attendance service? An  
461 explorative qualitative study in north West Ethiopia. *BMC Pregnancy Childbirth*. 2020 Dec;20(1):633.
- 462 24. Mekie M, Taklual W. Delivery place preference and its associated factors among women who  
463 deliver in the last 12 months in Simada district of Amhara Region, Northwest Ethiopia: a community  
464 based cross sectional study. *BMC Res Notes*. 2019 Dec;12(1):114.
- 465 25. Tesfaye B, Atique S, Azim T, Kebede MM. Predicting skilled delivery service use in Ethiopia: dual  
466 application of logistic regression and machine learning algorithms. *BMC Med Inform Decis Mak*. 2019  
467 Dec;19(1):209.
- 468 26. Fekadu M, Regassa N. Skilled delivery care service utilization in Ethiopia: analysis of rural-urban  
469 differentials based on national demographic and health survey (DHS) data. *Afr Health Sci*. 2015 Jan  
470 16;14(4):974.
- 471 27. Delele TG, Biks GA, Abebe SM, Kebede ZT. Determinants of Health Facility Delivery in Northwest  
472 Ethiopia: A Community-Based Case-Control Study. *Int J Gen Med*. 2021 Mar;Volume 14:993–1001.
- 473 28. Abebe HT, Adhana MT, Gebremichael MW, Gezae KE, Gebreslassie AA. Magnitude, trends and  
474 determinants of skilled delivery from Kilite-Awlaelo Health Demographic Surveillance System, Northern  
475 Ethiopia, 2009- 2017. Spradley FT, editor. *PLOS ONE*. 2021 Sep 9;16(9):e0254146.
- 476 29. Raru TB, Ayana GM, Yuya M, Merga BT, Kure MA, Negash B, et al. Magnitude, Trends, and  
477 Determinants of Institutional Delivery Among Reproductive Age Women in Kersa Health and  
478 Demographic Surveillance System Site, Eastern Ethiopia: A Multilevel Analysis. *Front Glob Womens  
479 Health*. 2022 Feb 28;3:821858.
- 480 30. Chan GJ, Hunegnaw BM, Van Wickle K, Mohammed Y, Hunegnaw M, Bekele C, et al. Birhan  
481 maternal and child health cohort: a study protocol. *BMJ Open*. 2021 Sep;11(9):e049692.
- 482 31. Bekele D, Hunegnaw BM, Bekele C, Van Wickle K, Tadesse F, Goddard FGB, et al. Cohort Profile:  
483 The Birhan Health and Demographic Surveillance System. *Int J Epidemiol*. 2021 Nov 9;dyab225.
- 484 32. Gabrysch S, Campbell OM. Still too far to walk: Literature review of the determinants of delivery  
485 service use. *BMC Pregnancy Childbirth*. 2009 Dec;9(1):34.

- 486 33. Chan GJ, Goddard FGB, Hunegnaw BM, Mohammed Y, Zeleke M, Haneuse S, et al. Estimates of  
487 stillbirths, neonatal mortality, and vulnerable live births in Amhara, Ethiopia. *Jama Netw Open*. 2022 Feb  
488 17;
- 489 34. Tilahun W, Bekana F, Biru A. Magnitude of Home Delivery and Associated Factors among  
490 Antenatal Care Booked Mothers in Delanta District, South Wollo Zone, North East Ethiopia: A Cross-  
491 Sectional Study, March 2018. *Int J Womens Health Wellness* [Internet]. 2018 Dec 31 [cited 2023 Jan  
492 20];4(2). Available from: [https://www.clinmedjournals.org/articles/ijwhw/international-journal-of-](https://www.clinmedjournals.org/articles/ijwhw/international-journal-of-womens-health-and-wellness-ijwhw-4-086.php?jid=ijwhw)  
493 [womens-health-and-wellness-ijwhw-4-086.php?jid=ijwhw](https://www.clinmedjournals.org/articles/ijwhw/international-journal-of-womens-health-and-wellness-ijwhw-4-086.php?jid=ijwhw)
- 494 35. Siyoum M, Astatkie A, Mekonnen S, Bekele G, Taye K, Tenaw Z, et al. Home birth and its  
495 determinants among antenatal care-booked women in public hospitals in Wolayta Zone, southern  
496 Ethiopia. Kibret GD, editor. *PLOS ONE*. 2018 Sep 7;13(9):e0203609.
- 497 36. Bayu H, Fisseha G, Mulat A, Yitayih G, Wolday M. Missed opportunities for institutional delivery  
498 and associated factors among urban resident pregnant women in South Tigray Zone, Ethiopia: a  
499 community-based follow-up study. *Glob Health Action*. 2015 Dec;8(1):28082.
- 500 37. Nigusie A, Azale T, Yitayal M. Institutional delivery service utilization and associated factors in  
501 Ethiopia: a systematic review and META-analysis. *BMC Pregnancy Childbirth*. 2020 Dec;20(1):364.
- 502 38. Tesfaw N, Gizachew A, Kassa GM, Abajobir AA. Skilled Delivery Service Utilization and Associated  
503 Factors among Mothers Who Gave Birth in the Last Two Years in Northwest Ethiopia. *Ethiop J Health Sci*  
504 [Internet]. 2018 [cited 2023 Jan 25];28(4). Available from:  
505 <https://www.ajol.info/index.php/ejhs/article/view/175549>
- 506 39. Ethiopia Demographic and Health Survey 2011. [Internet]. Central Statistical Agency - CSA  
507 Ethiopia and ICF; 2012. Available from: <https://dhsprogram.com/pubs/pdf/fr255/fr255.pdf>
- 508 40. Federal Ministry of Health (Ethiopia). Ethiopia Health Sector Development Program IV, Annual  
509 Report 2014-15. 2015.
- 510 41. Federal Ministry of Health (Ethiopia). Ethiopia Health Sector Development Program IV, Annual  
511 Report 2015-16. 2016.
- 512 42. Ballard K, Atnafu H, Belete Z, Kinfu H, Tadesse M, Amin M. Can a community-based maternal  
513 care package in rural Ethiopia increase the use of health facilities for childbirth and reduce the stillbirth  
514 rate? *Int J Womens Health*. 2016 Aug;Volume 8:421–8.
- 515 43. Ashimi AO, Amole TG. Prevalence, reasons and predictors for home births among pregnant  
516 women attending antenatal care in Birnin Kudu, North-west Nigeria. *Sex Reprod Healthc*. 2015  
517 Oct;6(3):119–25.
- 518 44. Mishra S, Chopra D, Jauhari N, Mishra A. Maternal health services utilization and influencing  
519 factors: A study in Lucknow district. *Int J Adv Community Med*. 2018;1(1):05–9.
- 520 45. Teferra AS, Alemu FM, Woldeyohannes SM. Institutional delivery service utilization and  
521 associated factors among mothers who gave birth in the last 12 months in Sekela District, North West of  
522 Ethiopia: A community - based cross sectional study. *BMC Pregnancy Childbirth*. 2012 Dec;12(1):74.



- 523 46. Yaya S, Bishwajit G, Ekholuenetale M, Shah V, Kadio B, Udenigwe O. Factors associated with  
524 maternal utilization of health facilities for delivery in Ethiopia. *Int Health* [Internet]. 2018 Feb 13 [cited  
525 2023 Jan 24]; Available from: [https://academic.oup.com/inthealth/advance-](https://academic.oup.com/inthealth/advance-article/doi/10.1093/inthealth/ihx073/4855965)  
526 [article/doi/10.1093/inthealth/ihx073/4855965](https://academic.oup.com/inthealth/advance-article/doi/10.1093/inthealth/ihx073/4855965)
- 527 47. Ross CE, Mirowsky J. Refining the association between education and health: The effects of  
528 quantity, credential, and selectivity. *Demography*. 1999 Nov 1;36(4):445–60.
- 529 48. Amwonya D, Kigosa N, Kizza J. Female education and maternal health care utilization: evidence  
530 from Uganda. *Reprod Health*. 2022 Dec;19(1):142.
- 531 49. Ahmed S, Creanga AA, Gillespie DG, Tsui AO. Economic Status, Education and Empowerment:  
532 Implications for Maternal Health Service Utilization in Developing Countries. Shea BJ, editor. *PLoS ONE*.  
533 2010 Jun 23;5(6):e11190.
- 534 50. Asres A, Davey G. Factors Associated with Safe Delivery Service Utilization Among Women in  
535 Sheka Zone, Southwest Ethiopia. *Matern Child Health J*. 2015 Apr;19(4):859–67.
- 536 51. Tsala Dimbuene Z, Amo-Adjei J, Amugsi D, Mumah J, Izugbara CO, Beguy D. WOMEN'S  
537 EDUCATION AND UTILIZATION OF MATERNAL HEALTH SERVICES IN AFRICA: A MULTI-COUNTRY AND  
538 SOCIOECONOMIC STATUS ANALYSIS. *J Biosoc Sci*. 2018 Nov;50(6):725–48.
- 539 52. Wuneh AD, Bezabih AM, Okwaraji YB, Persson LÅ, Medhanyie AA. Wealth and Education  
540 Inequities in Maternal and Child Health Services Utilization in Rural Ethiopia. *Int J Environ Res Public*  
541 *Health*. 2022 Apr 29;19(9):5421.
- 542 53. Okoli C, Hajizadeh M, Rahman MM, Khanam R. Geographical and socioeconomic inequalities in  
543 the utilization of maternal healthcare services in Nigeria: 2003–2017. *BMC Health Serv Res*. 2020  
544 Dec;20(1):849.
- 545 54. Bhusal UP. Predictors of wealth-related inequality in institutional delivery: a decomposition  
546 analysis using Nepal multiple Indicator cluster survey (MICS) 2019. *BMC Public Health*. 2021  
547 Dec;21(1):2246.
- 548 55. Bell J, Curtis SL, Alayon S. Trends in Delivery Care in Six Countries. *DHS Analytical Studies No. 7*.  
549 [Internet]. ORC Macro and International Research Partnership for Skilled Attendance for Everyone  
550 (SAFE).; 2003. Available from: <https://dhsprogram.com/pubs/pdf/AS7/AS7.pdf>
- 551 56. Nahar MstT, Anik SMFI, Islam MdA, Islam SMS. Individual and community-level factors  
552 associated with skilled birth attendants during delivery in Bangladesh: A multilevel analysis of  
553 demographic and health surveys. Kabir E, editor. *PLoS ONE*. 2022 Jun 29;17(6):e0267660.
- 554 57. Kabakyenga JK, Östergren PO, Turyakira E, Pettersson KO. Influence of Birth Preparedness,  
555 Decision-Making on Location of Birth and Assistance by Skilled Birth Attendants among Women in  
556 South-Western Uganda. Malaga G, editor. *PLoS ONE*. 2012 Apr 27;7(4):e35747.
- 557 58. Ettarh RR, Kimani J. Influence of Distance to Health Facilities on the Use of Skilled Attendants at  
558 Birth in Kenya. *Health Care Women Int*. 2016 Feb;37(2):237–49.

- 559 59. Dotse-Gborgbortsi W, Dwomoh D, Alegana V, Hill A, Tatem AJ, Wright J. The influence of  
560 distance and quality on utilisation of birthing services at health facilities in Eastern Region, Ghana. *BMJ*  
561 *Glob Health*. 2020 Feb;4(Suppl 5):e002020.
- 562 60. Gabrysch S, Cousens S, Cox J, Campbell OMR. The Influence of Distance and Level of Care on  
563 Delivery Place in Rural Zambia: A Study of Linked National Data in a Geographic Information System.  
564 Bryce J, editor. *PLoS Med*. 2011 Jan 25;8(1):e1000394.
- 565 61. Lohela TJ, Campbell OMR, Gabrysch S. Distance to Care, Facility Delivery and Early Neonatal  
566 Mortality in Malawi and Zambia. Schooling CM, editor. *PLoS ONE*. 2012 Dec 27;7(12):e52110.
- 567 62. Campbell OM, Graham WJ. Strategies for reducing maternal mortality: getting on with what  
568 works. *The Lancet*. 2006 Oct;368(9543):1284–99.
- 569 63. Lawn JE, Cousens S, Zupan J. 4 million neonatal deaths: When? Where? Why? *The Lancet*. 2005  
570 Mar;365(9462):891–900.
- 571 64. Thaddeus S, Maine D. Too far to walk: Maternal mortality in context. *Soc Sci Med*. 1994  
572 Apr;38(8):1091–110.
- 573 65. Gurara MK, Van Geertruyden JP, Gutema BT, Draulans V, Jacquemyn Y. Maternity waiting homes  
574 as component of birth preparedness and complication readiness for rural women in hard-to-reach areas  
575 in Ethiopia. *Reprod Health*. 2021 Dec;18(1):27.
- 576

### Reasons for Phase I Delay

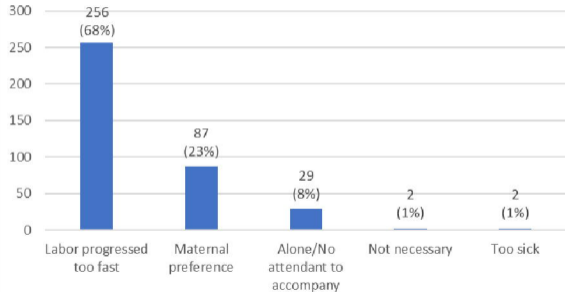

### Reasons for Phase II Delay

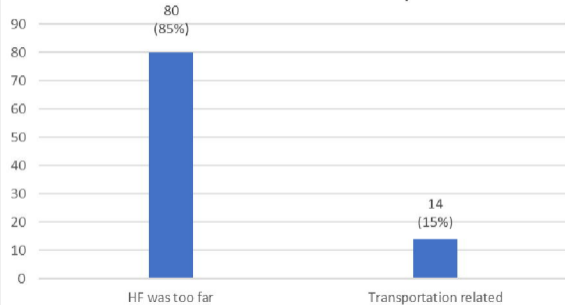

Source: https://medrxiv.org/content/10.1101/2023.08.04.23293667.full.pdf
